## **PRC1-dependent compaction of Hox gene clusters prevents transcriptional derepression during early *Drosophila* embryogenesis**

Thierry Cheutin and Giacomo Cavalli

### **Affiliations**

Institute of Human Genetics, UMR 9002 of the CNRS and the University of Montpellier, 34396 Montpellier, France

### **Corresponding authors:**

**Email:** [thierry.cheutin@igh.cnrs.fr](mailto:thierry.cheutin@igh.cnrs.fr) (T.C.); [giacomo.cavalli@igh.cnrs.fr](mailto:giacomo.cavalli@igh.cnrs.fr) (G.C.)

### **1 Summary paragraph**

2 Polycomb-group (PcG) proteins are conserved chromatin factors that maintain the silencing of key  
3 developmental genes, notably the Hox gene clusters, outside of their expression domains [1-3].  
4 Polycomb repressive complex 2 (PRC2) trimethylates lysine K27 of histone H3 [4], and PRC1  
5 collaborates with PRC2 in gene silencing. Genome-wide studies have revealed large H3K27me3  
6 chromatin domains bound by PcG proteins, and Polycomb domains fold into distinct nuclear  
7 structures [5-9]. Although PRC1 is involved in chromatin compaction [10-16], it is unknown  
8 whether PRC1-dependent transcriptional silencing is a consequence of its role on higher-order  
9 chromatin folding. This is because depletion of PRC1 proteins typically induces both chromatin  
10 unfolding and ectopic transcription, and ectopic transcription can open chromatin by itself. To  
11 disentangle these two components, we analysed the temporal effects of two PRC1 proteins,  
12 Polyhomeotic (Ph) and Polycomb (Pc), on Hox gene clusters during *Drosophila* embryogenesis.  
13 We show that the absence of Ph or Pc affects the higher-order chromatin folding of Hox clusters  
14 prior to ectopic Hox gene transcription, demonstrating that PRC1 primary function during early  
15 embryogenesis is to compact its target chromatin. During later embryogenesis, we observed further  
16 chromatin opening at Hox complexes in both Ph and Pc mutants, which was coupled to strong  
17 deregulation of Hox genes at this stage of development. Moreover, the differential effects of Ph  
18 and Pc on Hox cluster folding matches the differences in ectopic Hox gene expression observed in  
19 these two mutants, suggesting that the degree of Hox derepression in PcG mutants depends on the  
20 degree of structural constraints imposed by each PcG component. In summary, our data  
21 demonstrate that binding of PRC1 to large genomic domains during early embryogenesis induces  
22 the formation of compact chromatin to prevent ectopic gene expression at later time-points. Thus,  
23 epigenetic mechanisms such as Polycomb mediated silencing act by folding chromatin domains  
24 and impose an architectural layer to gene regulation.

25

## 26 Main text

27 PcG proteins are conserved epigenetic components, essential for cell differentiation, which  
28 maintain gene silencing during development [3]. PcG proteins affect both Hox gene expression and  
29 chromatin compaction of *Drosophila* and mammalian Hox gene clusters [11, 12, 17]. In *Drosophila*  
30 embryos, the best characterized target genes of PcG proteins are Hox genes, which are grouped  
31 into two large chromatin clusters of 350 to 400 kb, covered by histone H3K27me3 [5, 18-20]. The  
32 Antennapedia complex (ANT-C) includes *lab*, *pb*, *Dfd*, *Scr* and *Antp*, which control the cell identity  
33 of anterior segments, whereas the bithorax complex (BX-C) contains *Ubx*, *abdA* and *AbdB* genes,  
34 which are responsible for the identity of posterior segments [21, 22]. PcG proteins form two main  
35 classes of complexes, PRC2, which is responsible for the deposition of H3K27me3 and PRC1.  
36 PRC1 complexes are further subdivided in canonical PRC1 (cPRC1), which contains the Polycomb  
37 protein that binds to H3K27me3 via its chromo domain [23], and non-canonical PRC1 complexes,  
38 which lack Polycomb and contain various other subunits [3]. In flies, Hox gene expression is  
39 regulated by the cPRC1, which is composed of Sce, Psc-Suz2 and two proteins that are specific  
40 components of this complex: Ph and Pc. The mechanism by which cPRC1 mediates gene silencing  
41 is not understood. One hypothesis suggests that these proteins compact chromatin to form  
42 facultative heterochromatin and prevent gene activation [24, 25]. However, since deletion of PRC1  
43 proteins causes ectopic gene expression which can also open chromatin, a causal link is difficult to  
44 demonstrate. To distinguish whether higher-order chromatin folding precedes PRC1-dependent  
45 transcriptional silencing, we analysed the time-course of 3D chromatin compaction and Hox gene  
46 derepression in mutant embryos in which Ph or Pc have been deleted.

47 We first performed RNA fluorescence in situ hybridization (FISH) experiments in wild-  
48 type embryos to detect nascent transcripts of eight *Drosophila* Hox genes, using probes recognizing  
49 the first introns of those genes. As expected, our results show sequential expression of *lab*, *pb*, *Dfd*,  
50 *Scr*, *Antp*, *Ubx*, *abdA* and *AbdB* along the anteroposterior axis [21, 26] at the germ band elongated  
51 stage (3:50-7:20 after fertilization) (Extended Data Fig. 1a-f), which is conserved throughout  
52 *Drosophila* embryogenesis (Extended Data Fig. 2). We then performed a series of immuno-DNA  
53 FISH experiments in embryos at the germ band elongated stage to address 3D chromatin  
54 compaction of Hox clusters. We measured 3D distances between FISH spots for *Ubx*, *abdA* and  
55 *AbdB* of the BX-C cluster or *lab*, *Scr* and *Antp* of the ANT-C cluster. The variation of these inter-  
56 spot distances along the anteroposterior axis shows that transcription of each Hox gene correlates  
57 with the opening of its corresponding chromatin region, whereas the silenced portion of Hox  
58 complexes remains condensed (Extended Data Fig. 1g-j).

59 We then performed RNA FISH experiments in mutant embryos that were deficient in the  
60 Ph (*ph<sup>del</sup>*) and Pc (*Pc<sup>XT109</sup>*) subunits. In both mutants, Hox gene derepression started in a few cells,  
61 and the proportion of cells with derepression increased during later embryogenesis (Fig. 1f-k;  
62 Extended Data Fig. 2-3). *Ubx* was the first gene of the BX-C cluster to be expressed ectopically in  
63 the anterior PS of *ph<sup>del</sup>* embryos, whereas derepression of *abdA* and *AbdB* started later (Fig. 1a, f-  
64 h). Similarly, *Antp* was the first ANT-C gene to become derepressed in the head of both mutant  
65 embryos (Fig. i-k), whereas the others were derepressed at later stages (Extended Data Fig. 2-3).  
66 In both mutants, ectopic expression of each Hox gene depended on its position along the  
67 anteroposterior axis. For example, the number of cells showing ectopic *Ubx* expression decreased  
68 from PS4 to the anterior PS (Fig. 1a-b; Extended Data Fig. 2q and r), and *Scr* derepression was  
69 enhanced in the posterior PS compared with that in the head (Fig. 1j). Taken together these results  
70 indicated that Ph and Pc do not elicit a general silencing function of all Hox genes. Indeed, although

71 both proteins bind every Hox gene where they are repressed [27], loss of Hox gene silencing caused  
72 by Ph or Pc deletion was heterogeneous for different Hox genes. In addition, ectopic Hox gene  
73 transcription was generally stronger and started earlier in *ph<sup>del</sup>* embryos than in *Pc<sup>XT109</sup>* embryos  
74 (Extended Data Fig. 2). For example, *Ubx* and *Antp* derepression occurred as early as 3:50-4:50  
75 after fertilization in *ph<sup>del</sup>* embryos, but only after the 4:50-6:00 stage of embryonic development in  
76 *Pc<sup>XT109</sup>* (Fig.1 f, k). In contrast, *AbdB* was derepressed earlier in *Pc<sup>XT109</sup>* mutants than in *ph<sup>del</sup>*,  
77 especially in PS7-PS12 (Fig. 1h; Extended Data Fig. 2w-x). This suggests that different cPRC1  
78 subunits play specific roles on their target chromatin.

79 We then tested the possibility that cPRC1 mediates direct compaction of Hox clusters to  
80 prevent ectopic transcription. We reasoned that, if it does so, mutations in cPRC1 components  
81 would affect Hox compaction prior to any detectable transcriptional activation. To test this  
82 hypothesis, we performed DNA FISH experiments to monitor BX-C and ANT-C chromatin folding  
83 in the cell nuclei of *ph<sup>del</sup>* and *Pc<sup>XT109</sup>* embryos. At the 3:50-4:50 stage after fertilization, distances  
84 between *Ubx-abdA*, *abdA-AbdB* and *Ubx-abdB* were significantly increased in the head and PS0  
85 of *ph<sup>del</sup>* mutant embryos compared to those in control embryos (Fig. 2a-c), whereas neither *Ubx*,  
86 *abdA* nor *AbdB* were derepressed (Fig. 1f-h). Similar effects were observed in PS2-PS4 (Fig. 2g-i)  
87 where the derepression of *Ubx* occurred in only a few cells of *ph<sup>del</sup>* embryos (Fig. 1f). Despite a  
88 weaker effect of Pc on BX-C folding, *Pc<sup>XT109</sup>* mutant embryos displayed significantly greater *Ubx-*  
89 *abdA*, *abdA-AbdB* and *Ubx-abdB* distances than those of control embryos in PS2-PS4 at the 3:50-  
90 4:50 stage of development (Fig. 2g-i), without derepression of *Ubx*, *abdA* and *AbdB* (Fig. 1f-h).  
91 Similarly, Ph and Pc were both required to globally compact ANT-C in the heads of embryos from  
92 the 3:50-4:50 stage after fertilization (Fig. 3a-c), whereas *Antp* was the only Hox gene of the ANT-  
93 C cluster to be derepressed, and this occurred only in *ph<sup>del</sup>* mutants (Fig. 1i-k). These results show  
94 that in PSs where every Hox gene of one complex is repressed, the first effect of Ph and Pc on Hox  
95 clusters folding can be detected before ectopic Hox gene transcription and affected whole Hox  
96 complexes, whereas the first effects on Hox genes derepression affected a minority of the Hox  
97 genes.

98 To compare Ph and Pc, we plotted the effect of *ph* or *Pc* deletions on distances measured  
99 within the BX-C (Fig. 2d-f; j-l) or the ANT-C (Fig. 3d-f). After the 4:50-6:00 stage, the effect of  
100 both proteins on BX-C folding progressively increased (Fig. 2d-f; j-l) with a timing matching the  
101 ectopic expression of *abdA* and *AbdB* (Fig. 1g-h). 7:20-12:00 hours after fertilization, both mutant  
102 embryos showed a stronger opening of the BX-C, in the head-PS0 (Fig. 2a-c) and PS2-PS4 (Fig.  
103 2g-i).. To summarize these effects, we plotted the three median distances between the promoters  
104 of *Ubx*, *abdA* and *AbdB* (Fig. 2m-p) or between *lab*, *Scr* and *Antp* (Fig. 3g-j). During early  
105 embryogenesis, the effects of the loss of Ph and Pc on Hox cluster folding were significant (Fig.  
106 2a-c, n; 3a-c, h and Extended Data Fig. 4a-f), although a stronger decompaction of Hox clusters  
107 was observed in later embryogenesis (Fig. 2a-c, o; 3a-c, i and Extended Data Fig. 4g-l), consistent  
108 with strong ectopic Hox expression. These late effects coincide with the pattern of distance changes  
109 observed during physiological Hox activation in the appropriate PSs (Fig. 2p, 3j). Therefore, the  
110 strong effects on Hox distances observed in late development in the mutants is most likely due to  
111 the effect of ectopic transcription. Taken together, these results demonstrate that the loss of PRC1  
112 prevents the condensation of Hox clusters prior to any transcriptional derepression. Thus,  
113 chromatin opening in the mutants is not a consequence of transcription, suggesting that the primary  
114 function of PRC1 is to establish a compact architecture in cells where Hox loci are silenced.

115 Finally, we investigated the consequences of *Pc*- or *ph*-null mutations on Hox loci in  
116 regions in which they are actively transcribed in WT embryos. No effect on Hox genes transcription  
117 in these regions were revealed by RNA FISH analysis during early embryogenesis (3:50-6:00 after  
118 fertilization) (Fig. 1f-k). In PS9-PS12, where *Ubx* and *abdA* are expressed but *AbdB* is not, no  
119 significant effect on the *Ubx-abdA* distance was observed. However, as expected, the *abdA-AbdB*  
120 distance was increased in both *ph<sup>del</sup>* and *Pc<sup>XT109</sup>* embryos compared to control embryos (Fig. 4a-b).  
121 Conversely, the distance *abdA-AbdB* was not increased in PS14 where *AbdB* is expressed, while  
122 the distance *Ubx-abdA* increased in both mutants during embryogenesis (Fig. 4c-d). Similarly, the  
123 lack of Ph or Pc did not increase the distance *Scr-Antp* in PS4-PS5, where *Antp* is expressed, while  
124 the distance *lab-Scr* was significantly increased in the same region (Fig. 4e-f). These results  
125 demonstrate that Pc and Ph compact chromatin fibres encompassing Hox genes only in cells in  
126 which they are repressed (Extended Data Fig. 5-6).

127 Interestingly, Pc was found to have a weaker effect than Ph on Hox clusters folding in the  
128 PS where every Hox gene of each complex is repressed (Fig. 2-3). Consistent with a difference  
129 between these two cPRC1 subunits, the nuclear Pc distribution became diffuse in *ph<sup>del</sup>* embryos,  
130 whereas Ph still accumulated in nuclear foci in *Pc<sup>XT109</sup>* embryos (Extended Data Fig. 7a-c).  
131 Immuno-FISH experiments using anti-Ph and anti-Pc antibodies and FISH probes recognizing  
132 either *abdA* or *Scr* showed that Ph protein still accumulated at *abdA* and *Scr* loci in *Pc<sup>XT109</sup>*  
133 embryos. This is in contrast to the nuclear distribution of Pc, which did not accumulate on the same  
134 genes in *ph<sup>del</sup>* embryos (Fig. 4g; Extended Data Fig. 7d-e). In contrast, the effect of Pc and Ph on  
135 the distance *abdA-AbdB* is similar in posterior PSs (Fig. 4a; Extended Data Fig. 5b, e). For each  
136 PS where *abdA* or *AbdB* is repressed in WT embryos, we calculated the difference of *abdA* or *AbdB*  
137 expression between *ph<sup>del</sup>* and *Pc<sup>XT109</sup>* mutant embryos at stage 4:50-6:00. Scatterplots between  
138 these latter values and the difference of distance *abdA-AbdB* between *ph<sup>del</sup>* and *Pc<sup>XT109</sup>* mutant  
139 embryos at stage 3:50-4:50 showed correlations between chromatin opening and later ectopic  
140 transcription (Fig. 4h-i), suggesting a causal link between chromatin condensation and gene  
141 silencing.

142 Taken together, these results demonstrate that cPRC1 compacts Hox clusters via the  
143 formation of higher-order chromosome structures during early *Drosophila* embryogenesis (Fig.  
144 4j). The general effect on chromatin compaction contrasts with the transcriptional effects observed  
145 in the absence of these proteins, with ectopic transcription occurring later than chromatin opening,  
146 with timing and localizations that are specific to each Hox gene. It can be speculated that these  
147 differences reflect the relative abundance and target site affinity for cognate transcription factors.  
148 Moreover, the roles of the Ph and Pc proteins in the formation of PRC1 foci and Hox gene silencing  
149 are not equivalent, with Ph showing strongest effects, except on the *abdA* and *AbdB* region of the  
150 BX-C. Although the molecular reasons for this difference are not known, one possible explanation  
151 is that, in the absence of Pc and of its chromo domain, cPRC1 might only lose its anchoring to  
152 H3K27me3 while retaining some of its ability to bind target regulatory elements and mediate their  
153 clustering through oligomerization [8, 17, 28] (Extended Data Fig. 7f-g) [29]. The comparatively  
154 strong effect of *Pc* deletion on the *abdA-AbdB* region of the BX-C locus might be explained by the  
155 fact that H3K27me3 levels are highest in this region compared to all others [27]. On the other hand,  
156 in the absence of Ph, cPRC1 might either dissolve or it might lose its ability to bind its target loci,  
157 therefore inducing strong decompaction throughout the BX-C and ANT-C and, consequently, a  
158 generally stronger loss of silencing than *Pc* mutants. Further studies will be required to elucidate  
159 this point and the mechanism of PRC1-mediated silencing at other genes. In particular, it will be

160 interesting to test whether the role of PRC1 in chromatin condensation is only predominant at large  
161 Polycomb domains containing many PRC1 binding sites and whether the mechanisms of silencing  
162 differ at smaller target loci, both in *Drosophila* and in mammals.

## References

1. Geisler, S.J. and R. Paro, *Trithorax and Polycomb group-dependent regulation: a tale of opposing activities*. Development, 2015. **142**(17): p. 2876-87.
2. Jaensch, E.S., S. Kundu, and R.E. Kingston, *Multitasking by Polycomb response elements*. Genes Dev, 2017. **31**(11): p. 1069-1072.
3. Schuettengruber, B., et al., *Genome Regulation by Polycomb and Trithorax: 70 Years and Counting*. Cell, 2017. **171**(1): p. 34-57.
4. Holoch, D. and R. Margueron, *Mechanisms Regulating PRC2 Recruitment and Enzymatic Activity*. Trends Biochem Sci, 2017. **42**(7): p. 531-542.
5. Schuettengruber, B., et al., *Functional anatomy of polycomb and trithorax chromatin landscapes in Drosophila embryos*. PLoS Biol, 2009. **7**(1): p. e13.
6. Sexton, T., et al., *Three-dimensional folding and functional organization principles of the Drosophila genome*. Cell, 2012. **148**(3): p. 458-72.
7. Cheutin, T. and G. Cavalli, *Progressive polycomb assembly on H3K27me3 compartments generates polycomb bodies with developmentally regulated motion*. PLoS Genet, 2012. **8**(1): p. e1002465.
8. Wani, A.H., et al., *Chromatin topology is coupled to Polycomb group protein subnuclear organization*. Nat Commun, 2016. **7**: p. 10291.
9. Pirrotta, V. and H.B. Li, *A view of nuclear Polycomb bodies*. Curr Opin Genet Dev, 2012. **22**(2): p. 101-9.
10. Lau, M.S., et al., *Mutation of a nucleosome compaction region disrupts Polycomb-mediated axial patterning*. Science, 2017. **355**(6329): p. 1081-1084.
11. Eskeland, R., et al., *Ring1B compacts chromatin structure and represses gene expression independent of histone ubiquitination*. Mol Cell, 2010. **38**(3): p. 452-64.
12. Kundu, S., et al., *Polycomb Repressive Complex 1 Generates Discrete Compacted Domains that Change during Differentiation*. Mol Cell, 2017. **65**(3): p. 432-446 e5.
13. Boettiger, A.N., et al., *Super-resolution imaging reveals distinct chromatin folding for different epigenetic states*. Nature, 2016. **529**(7586): p. 418-22.
14. Schoenfelder, S., et al., *Polycomb repressive complex PRC1 spatially constrains the mouse embryonic stem cell genome*. Nat Genet, 2015. **47**(10): p. 1179-86.
15. Dekker, J. and E. Heard, *Structural and functional diversity of Topologically Associating Domains*. FEBS Lett, 2015. **589**(20 Pt A): p. 2877-84.
16. Cheutin, T. and G. Cavalli, *Polycomb silencing: from linear chromatin domains to 3D chromosome folding*. Curr Opin Genet Dev, 2014. **25**: p. 30-7.
17. Lanzuolo, C., et al., *Polycomb response elements mediate the formation of chromosome higher-order structures in the bithorax complex*. Nat Cell Biol, 2007. **9**(10): p. 1167-74.
18. Schwartz, Y.B. and V. Pirrotta, *Polycomb silencing mechanisms and the management of genomic programmes*. Nat Rev Genet, 2007. **8**(1): p. 9-22.
19. Wedeen, C., K. Harding, and M. Levine, *Spatial regulation of Antennapedia and bithorax gene expression by the Polycomb locus in Drosophila*. Cell, 1986. **44**(5): p. 739-48.

20. Lewis, E.B., *A gene complex controlling segmentation in Drosophila*. Nature, 1978. **276**(5688): p. 565-70.
21. Harding, K., et al., *Spatially regulated expression of homeotic genes in Drosophila*. Science, 1985. **229**(4719): p. 1236-42.
22. Maeda, R.K. and F. Karch, *The open for business model of the bithorax complex in Drosophila*. Chromosoma, 2015. **124**(3): p. 293-307.
23. Fischle, W., et al., *Molecular basis for the discrimination of repressive methyl-lysine marks in histone H3 by Polycomb and HP1 chromodomains*. Genes Dev, 2003. **17**(15): p. 1870-81.
24. Francis, N.J., R.E. Kingston, and C.L. Woodcock, *Chromatin compaction by a polycomb group protein complex*. Science, 2004. **306**(5701): p. 1574-7.
25. Grau, D.J., et al., *Compaction of chromatin by diverse Polycomb group proteins requires localized regions of high charge*. Genes Dev, 2011. **25**(20): p. 2210-21.
26. Kosman, D., et al., *Multiplex detection of RNA expression in Drosophila embryos*. Science, 2004. **305**(5685): p. 846.
27. Bowman, S.K., et al., *H3K27 modifications define segmental regulatory domains in the Drosophila bithorax complex*. Elife, 2014: p. e02833.
28. Isono, K., et al., *SAM domain polymerization links subnuclear clustering of PRC1 to gene silencing*. Dev Cell, 2013. **26**(6): p. 565-77.
29. Kahn, T.G., et al., *Interdependence of PRC1 and PRC2 for recruitment to Polycomb Response Elements*. Nucleic Acids Res, 2016. **44**(21): p. 10132-10149.

## Figures

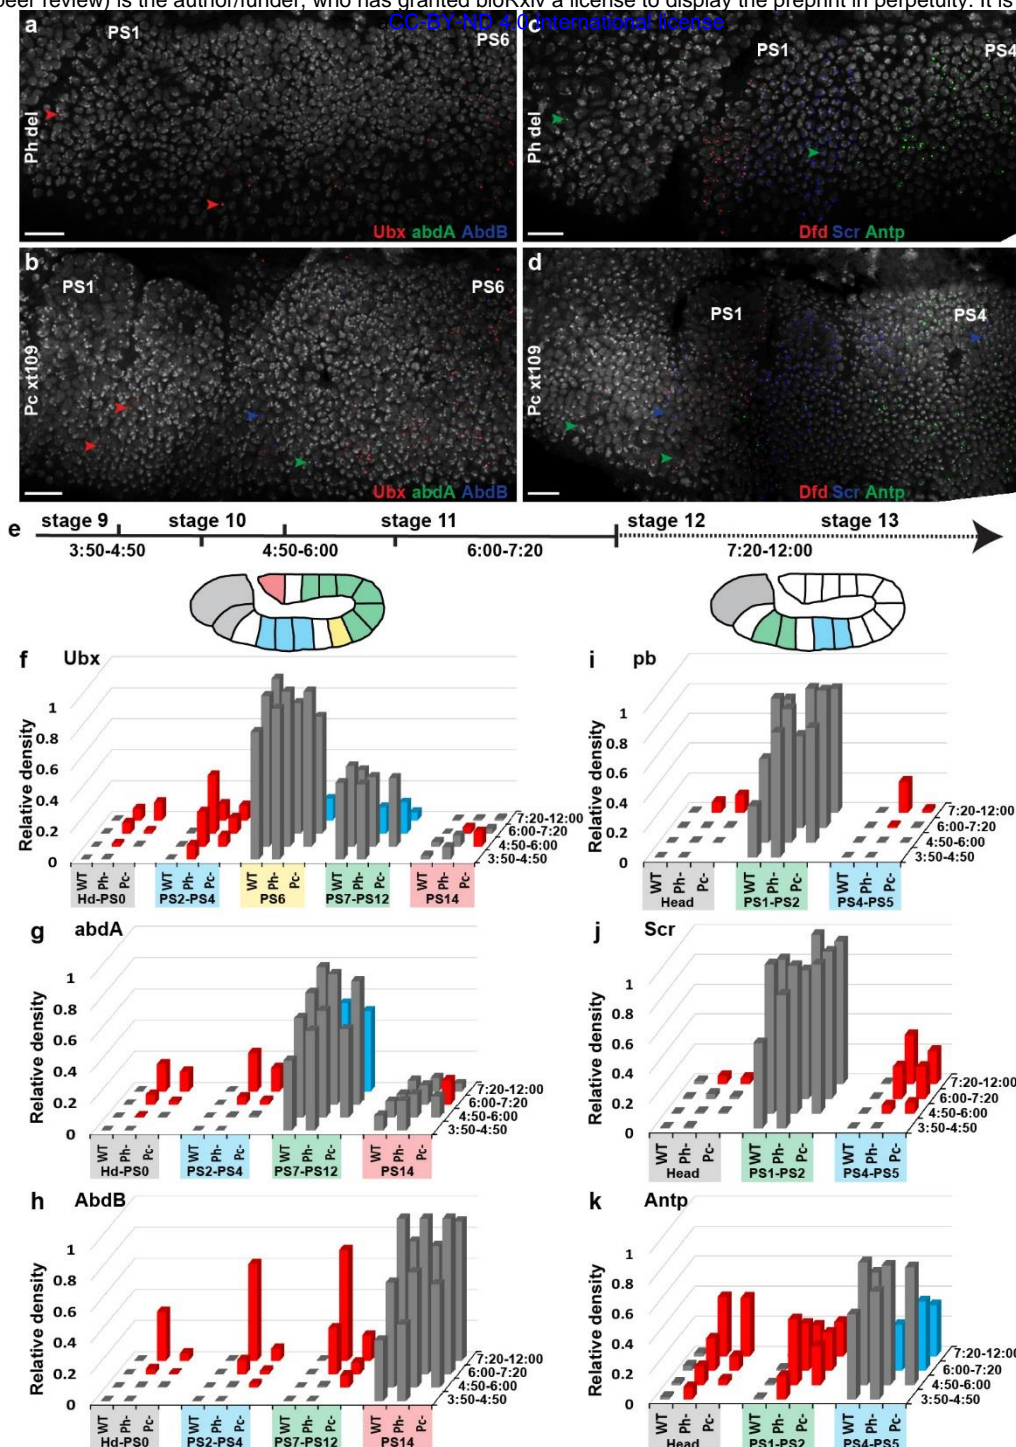

**Figure 1: Timing of Hox gene derepression in *Ph<sup>del</sup>* and *Pc<sup>XT109</sup>* embryos.** a-d, RNA FISH images illustrating the earliest ectopic Hox gene expression observed in *ph<sup>del</sup>* (a-b) and *Pc<sup>XT109</sup>* (c-d) embryos. Arrowheads indicate few cells showing Hox gene transcription outside of their domains of expression (*Ubx*: red in a, b; *abdA*: green in b; *AbdB*: blue in b; *Antp*: green in c, d and *Scr*: blue in d). Scale bars, 20  $\mu$ m. e, Embryos were grouped into four classes based on their developmental stage, which depended on the duration of their development after fertilization at 25°C. f-k, Relative densities of RNA FISH spots corresponding to *Ubx* (f), *abdA* (g), *AbdB* (h), *pb* (i), *Scr* (j) and *Antp* (k) expression measured in WT, *Ph<sup>del</sup>* and *Pc<sup>XT109</sup>* embryos during development. For simplicity, PSs wherein Hox genes of BX-C (f-h) and ANT-C (i-k) behave similarly were grouped (Complete Data are shown in Extended Data Figure 2). Red columns indicate where and when Hox gene transcription was significantly (Mann-Whitney U test,  $P < 0.01$ ) ectopically expressed in the mutants compared to WT embryos, whereas the blue columns show significant (Mann-Whitney U test,  $P < 0.01$ ) downregulation of Hox gene transcription.

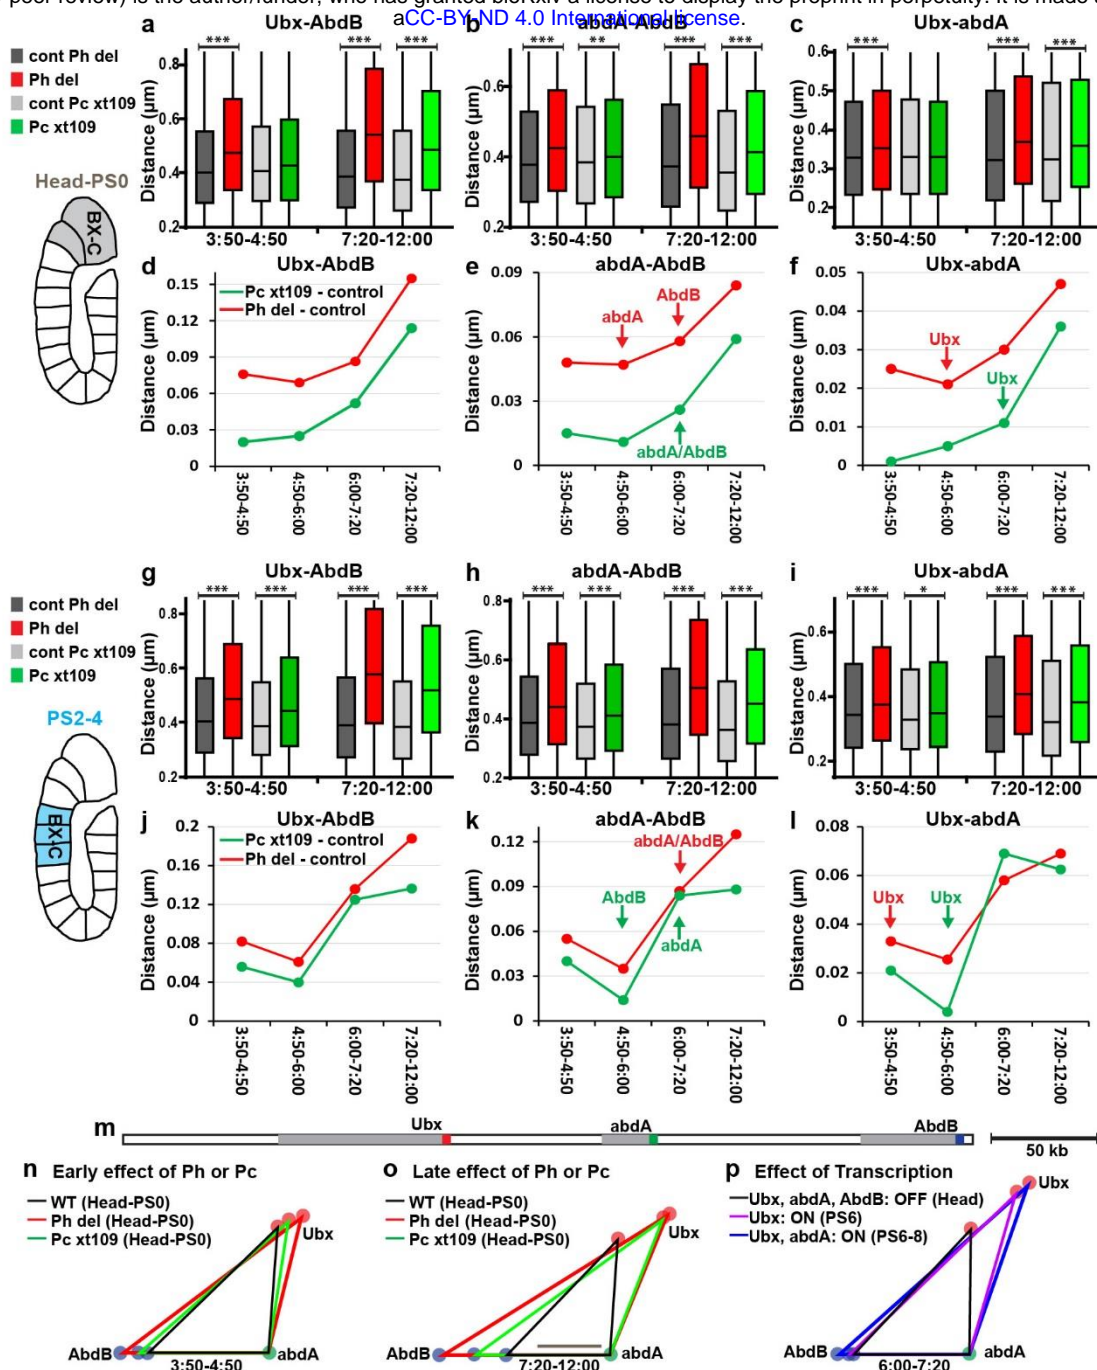

**Figure 2: Ph and Pc are required to compact repressed BX-C before ectopic Hox gene transcription.** **a-c;** Box plots displaying distributions of the distances *Ubx-AbdB* (**a**; **g**), *abdA-AbdB* (**b**; **h**), *Ubx-abdA* (**c**; **i**), in the head-PS0 (**a-c**), and in PS2-PS4 (**g-i**) during early and late embryogenesis. Distances were measured in the cell nuclei of *ph<sup>del</sup>* embryos (red) and their respective controls (dark grey) or *Pc<sup>XT109</sup>* embryos (green) and their respective controls (light grey). The lower and upper bounds of the coloured rectangles correspond to the first and third quartiles, whereas the middle bars show the median distances. The black lines indicate significant differences between the mutants and their respective control embryos (Mann-Whitney U test, \*  $P < 0.05$ ; \*\*  $P < 0.01$ ; \*\*\*  $P < 0.001$ ). **d-f;** **j-l;** Difference between the median distances *Ubx-AbdB* (**d**; **j**), *abdA-AbdB* (**e**; **k**), *Ubx-abdA* (**f-l**) measured in *ph<sup>del</sup>* and their control embryos (red) or in *Pc<sup>XT109</sup>* and their control embryos (green), during embryonic development in head-PS0 (**d-f**) and PS2-PS4 (**j-l**). Arrows indicate when a Hox gene is firstly ectopically expressed in *ph<sup>del</sup>* (red) or *Pc<sup>XT109</sup>* (green) embryos. **m**, Schematic linear representation of BC-X showing the DNA FISH probe positions. **n-p**, Comparison of the effects of Ph and Pc on the folding of BX-C during early (**n**) and late embryogenesis (**o**) with the openings induced by Hox gene transcription (**p**). Scale bars, 100 nm.



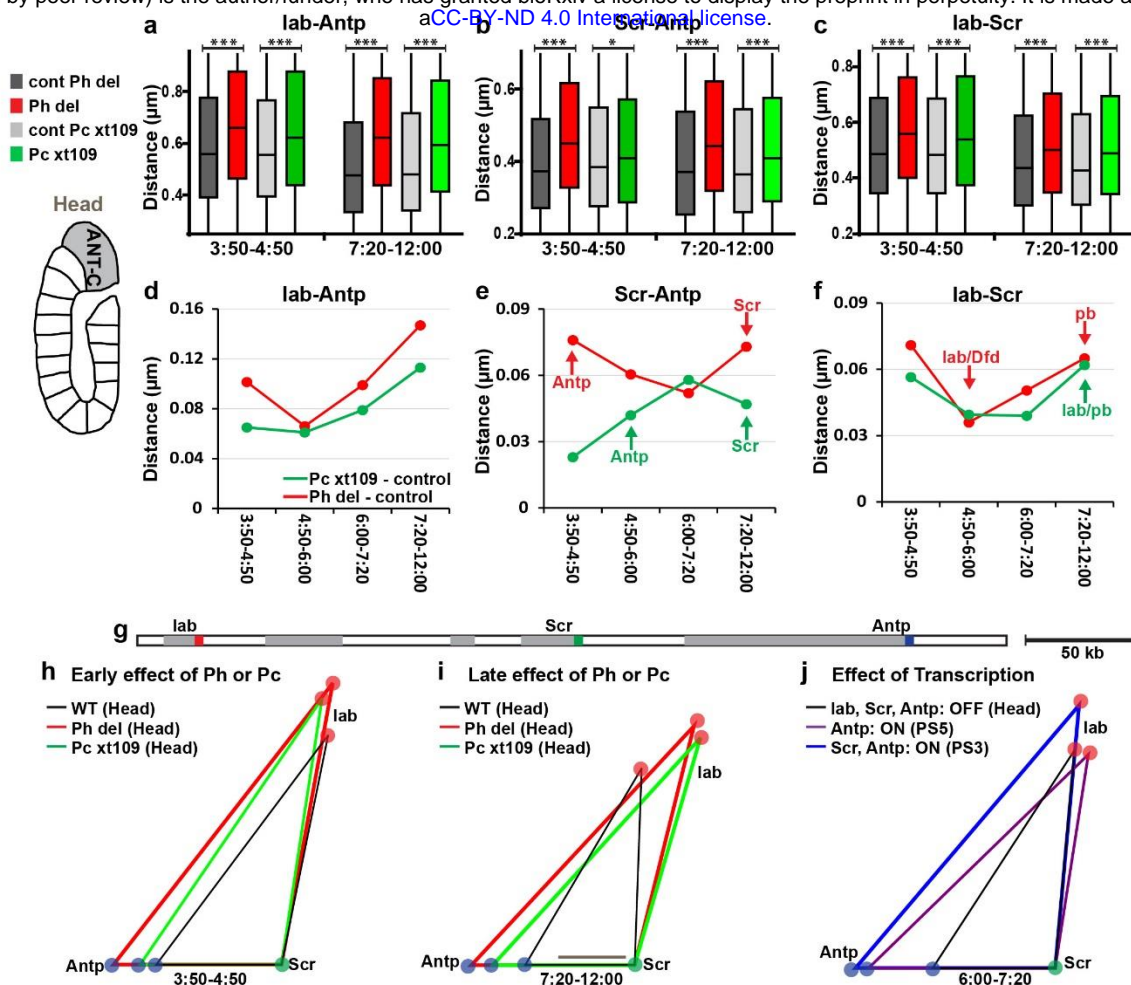

**Figure 3: Ph and Pc are required to compact repressed ANT-C before ectopic Hox gene transcription.** **a-c**, Box plots displaying distributions of the distances: *lab-Antp* (a), *Scr-Antp* (b) and *lab-Scr* (c) in the head during early and late embryogenesis. Distances were measured in the cell nuclei of *Ph<sup>del</sup>* embryos (red) and their respective controls (dark grey) or *Pc<sup>XT109</sup>* embryos (green) and their respective controls (light grey). The lower and upper bounds of the coloured rectangles correspond to the first and third quartiles, whereas the middle bars show the median distances. The black lines indicate significant differences between the mutants and their respective control embryos (Mann-Whitney U test, \*  $P < 0.05$ ; \*\*  $P < 0.01$ ; \*\*\*  $P < 0.001$ ). **d-f**, Difference between the median distances *lab-Antp* (d), *Scr-Antp* (e) and *lab-Scr* (f) measured in *ph<sup>del</sup>* and their control embryos (red) or in *Pc<sup>XT109</sup>* and their control embryos (green) during embryonic development in head. Arrows indicate when a Hox gene is firstly ectopically expressed in *ph<sup>del</sup>* (red) or *Pc<sup>XT109</sup>* (green) embryos. **g**, Schematic linear representation of ANT-C showing the DNA FISH probe positions. **h-j**, Comparison of the effects of Ph and Pc on the folding of ANT-C inside cell nuclei during early (h) and late embryogenesis (i) with the openings induced by Hox gene transcription (j). Scale bars, 100 nm.

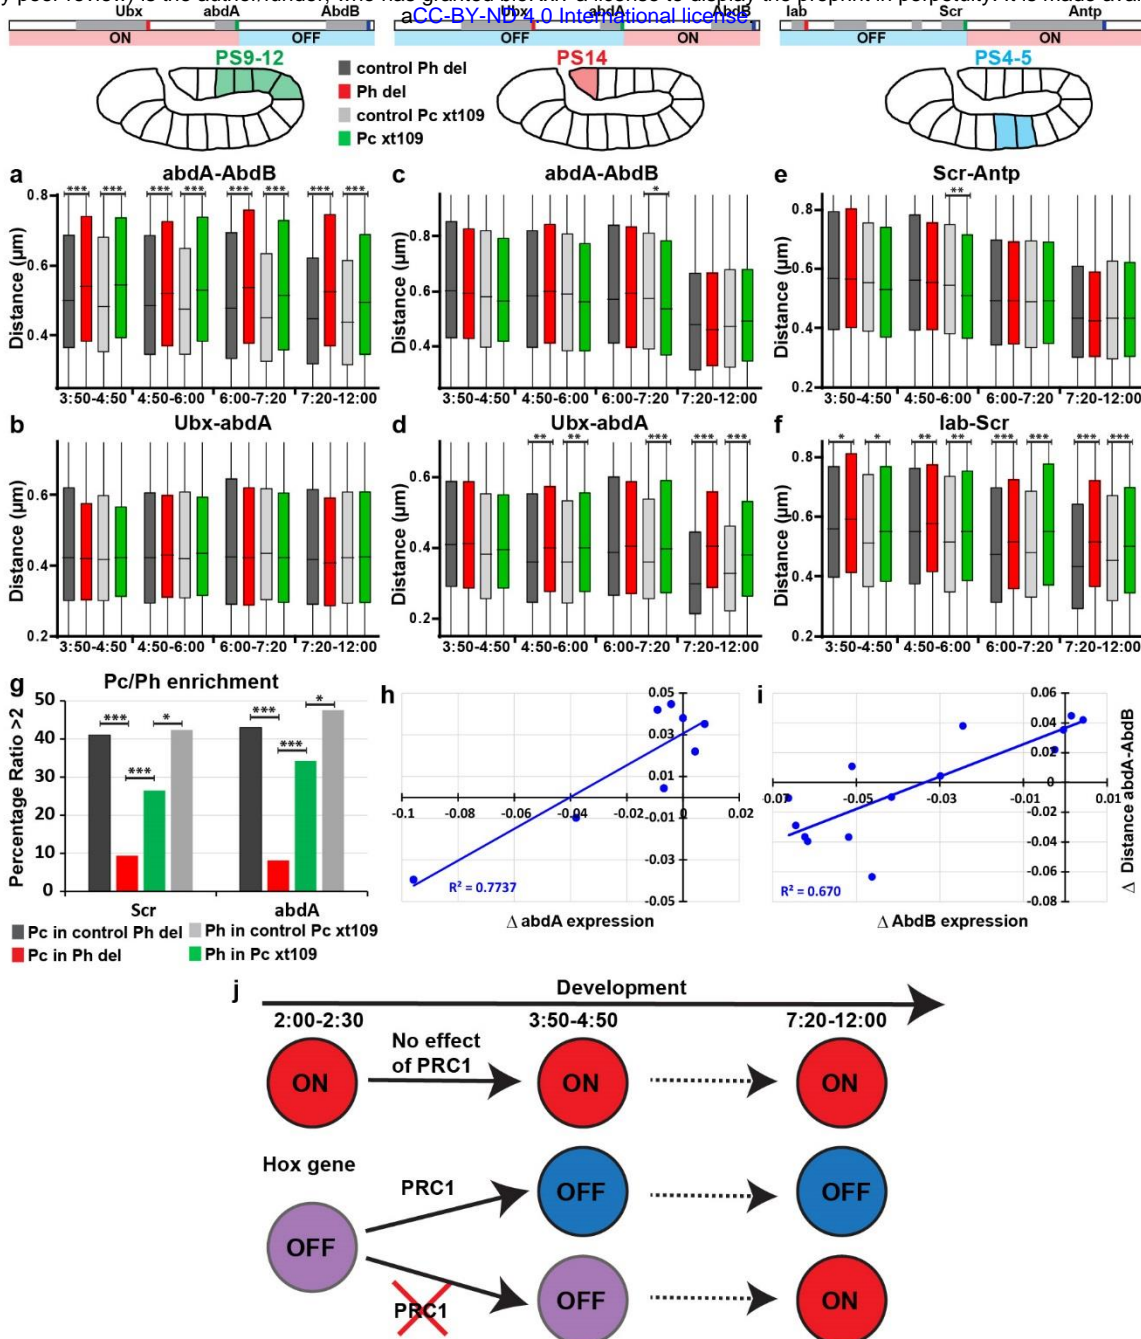

**Figure 4: cPRC1 only compacts chromatin in the repressed regions of the BX-C and ANT-C domains.** **a-f**, Box plots displaying distributions of the distances *abdA-AbdB* (a; c), *Ubx-abdA* (b; d), *Scr-Antp* (e) and *lab-Scr* (f) measured in the cell nuclei of *Ph<sup>del</sup>* embryos (red) and their respective controls (dark grey) or *Pc<sup>XT109</sup>* embryos (green) and their respective controls (light grey). Measurements were made in PS9-12 (a-b), PS14 (c-d), and PS4-5 (e-f) during development. The lower and upper bounds of the coloured rectangles correspond to the first and third quartiles, whereas the middle bars indicate the median distances. **g**, Charts presenting the percentage of DNA FISH spots with Pc or Ph enrichment more than two times the average intensity inside the cell nuclei. Significant differences are indicated (Mann-Whitney, U test, \*  $P < 0.05$ ; \*\*  $P < 0.01$ ; \*\*\*  $P < 0.001$ ). **h-i**, Scatterplots showing correlations between the differential effect of Ph and Pc on the distance *abdA-AbdB* at 3:50-4:50 and the differential effect of Ph and Pc on *AbdB* or *abdA* expression at 4:50-6:00. Each point corresponds to one PS where *abdA* (h) or *AbdB* (i) are repressed in WT embryos. **j**, Schematic diagram summarizing the effects of PRC1 on Hox gene folding and transcription. Circles represent silenced (OFF) or transcribed (ON) chromatin associated with Hox genes (red, open; purple, partly compact; blue fully compact). cPRC1 has no effect when Hox genes are expressed and chromatin is open. When Hox genes are repressed, cPRC1 compacts their chromatin during early embryogenesis and they will remain silenced. Without cPRC1, this compaction cannot occur and silenced Hox genes might become subsequently transcribed.

## **Acknowledgements**

We thank Montpellier Resources Imaging facility MRI-IGH for microscopy support. We thank Satish Sati and Frédéric Bantignies for critical reading of the manuscript. G.C. Research in the laboratory of G.C. was supported by grants from the European Research Council (ERC-2008-AdG No 232947), the CNRS, the FP7 European Network of Excellence EpiGeneSys, the European Union's Horizon 2020 research and innovation programme under grant agreement No 676556 (MuG), the Agence Nationale de la Recherche, the Fondation pour la Recherche Médicale, INSERM, the French National Cancer Institute (INCa) and the Laboratory of Excellence EpiGenMed.

## **Author contributions**

T.C., and G.C. initiated and led the project. T.C performed experiments and data analysis. T.C. and G.C. interpreted and discussed the data and wrote the manuscript.

## **Competing financial interests**

The authors declare no competing financial interests.
